# Supplementary material for: Pilot-Scale Continuous Synthesis of Pt Single-Atom Catalysts via Electron-Beam Processing in Ice Matrices
Source: Research Square preprint supplement (doi:10.21203/rs.3.rs-8276245/v1), 2025-12-09
Supplement: Supplementary file 1 [file db062beca3dcd783f563fc01.docx]

**Supplementary Information**

**Pilot-Scale Continuous Synthesis of Pt Single-Atom Catalysts via Electron-Beam Processing in Ice Matrices**

Soyeon Si1,[[1]](#footnote-1)†, Dami Yun2,3,†, Youn-Mook Lim2, Hyun-Bin Kim2, Seung-Hwan Oh2, Byungnam Kim2, Huisu Kim2, Jeong Hoon Park2, Inchan Kwon3, Sehyun Lee1,*, Jin-Mun Yun2,*

1Department of Materials Science and Engineering, Sungshin Women’s University (SSWU), Seoul 01133, Republic of Korea.

2Advanced Radiation Technology Institute, Korea Atomic Energy Research Institute (KAERI), Jeongeup, Jeollabuk-do 56212, Republic of Korea.

3School of Materials Science and Engineering, Gwangju Institute of Science and Technology (GIST), Gwangju 61005, Republic of Korea.

* Corresponding author: sehyun@sungshin.ac.kr, yjm90@kaeri.re.kr

**Supplementary Table 1. Comparison of TOF values of RI-SAC with those of previously reported Pt-based catalysts**

| **Catalyst** | **Electrolyte** | **Voltage (V vs. RHE)** | **TOF (s−1)** | **Source** |
| --- | --- | --- | --- | --- |
| RI-SAC | 1.0 M KOH | 100 mV | 7.63 | This work |
| Pt/C | 1.0 M KOH | 100 mV | 2.42 | This work |
| Pt/C(1.87) | 1.0 M KOH | 100 mV | 4.82 | This work |
| Pt@CoS | 1.0 M KOH | 100 mV | 0.131 | [1] |
| Pt-Ru/Acet | 1.0 M KOH | 100 mV | 0.7 | [2] |
| Pt1/(Co,Ni)(OH)2/C | 1.0 M KOH | 100 mV | 5.950 | [3] |
| Pt/C60-2/KB | 1.0 M KOH | 100 mV | 5.55 | [4] |
| PtRu@CNT | 1.0 M KOH | 100 mV | 3.06 | [5] |
| Pt-CoFe | 1.0 M KOH | 100 mV | 2.32 | [6] |
| PtSA@MoS2 | 1.0 M KOH | 100 mV | 0.806 | [7] |
| PtCu/NC | 1.0 M KOH | 100 mV | 1.44 | [8] |
| Ni-NiO-Pt | 1.0 M KOH | 100 mV | 5.69 | [9] |

* Source numbers correspond to the Supplementary references section

**Supplementary Table 2. Comparison of mass activities of RI-SAC with those of previously reported Pt-based catalysts**

| **Catalyst** | **Electrolyte** | **Overpotential**  **(V vs. RHE)** | **Mass activity**  **(A mg−1)** | **Source** |
| --- | --- | --- | --- | --- |
| RI-SAC | 1.0 M KOH | 0.85 | 7.002 | This work |
| Pt/C | 1.0 M KOH | 0.85 | 0.8489 | This work |
| Pt/C(1.87) | 1.0 M KOH | 0.85 | 2.996 | This work |
| PtP2@PNC | 0.1 M KOH | 0.85 | 0.35 | [10] |
| Pt/Nb-SnO2 | 0.1 M HClO4 | 0.90 | 0.55 | [11] |
| Pt24 | 0.1 M KOH | 0.90 | 0.2254 | [12] |
| PtCu/C-10 | 0.1 M HClO4 | 0.90 | 1.19 | [13] |
| d-int−Pt-Co/C | 0.1 M HClO4 | 0.90 | 1.69 | [14] |
| PtCu aerogels/C | 0.1 M HClO4 | 0.90 | 0.3964 | [15] |
| PtCo/C-600 | 0.1 M HClO4 | 0.90 | 0.68 | [16] |
| Pt@Mn-SAs/N-C | 1.0 M KOH | 0.85 | 0.62 | [17] |
| PtCuNC-700 | 0.1 M HClO4 | 0.90 | 0.45 | [18] |
| NPP-70 | 0.1 M KOH | 0.85 | 1.0092 | [19] |
| Pt1Ni1@Pt/C | 0.1 M KOH | 0.90 | 1.424 ± 0.019 | [20] |
| NiPP | 0.1 M KOH | 0.85 | 5.0503 | [21] |
| Ge-L10-PtZn@N-C | 0.1 M KOH | 0.90 | 3.04 | [22] |
| PdPt–CoNi | 0.1 M KOH | 0.85 | 3.250 | [23] |
| Pt@Co | 0.1 M KOH | 0.85 | 0.817 | [24] |

* Source numbers correspond to the Supplementary references section

**Supplementary Table 3. Comparison of TOF values of RI-SAC with those of previously reported Pt-based catalysts**

| **Metal** | **Support** | **Scale** | **Loading** | **Methods** | **Application** | **Note** | **Source** |
| --- | --- | --- | --- | --- | --- | --- | --- |
| Pd | ZnO | ~1 kg | 0.25 wt% | Ball-milling, calcination | Selective dehydrogenation reaction of phenylacetylene | batch | [25] |
| Pd | Fe2O3 | ~1 kg | 0.2 wt% | Ball-milling, calcination | Suzuki–Miyaura cross-coupling reaction | batch | [26] |
| Pd | Fe2O3 | 1 kg/day | 0.23 wt% | Precursor-atomization strategy | Suzuki–Miyaura cross-coupling reaction | continuous | [27] |
| Cu | CN | 3.565 kg | 9.97 wt% | Metal coordination Route | CO2RR | batch | [28] |
| Ni | C | 1.6 kg | 2.5 wt% | Ligand-mediated method | CO2RR | - | [29] |
| Co | ZIF-8 | ~ 24 g | 3.3 wt% | Solid-phase synthesis | ORR | batch | [30] |

* Source numbers correspond to the Supplementary references


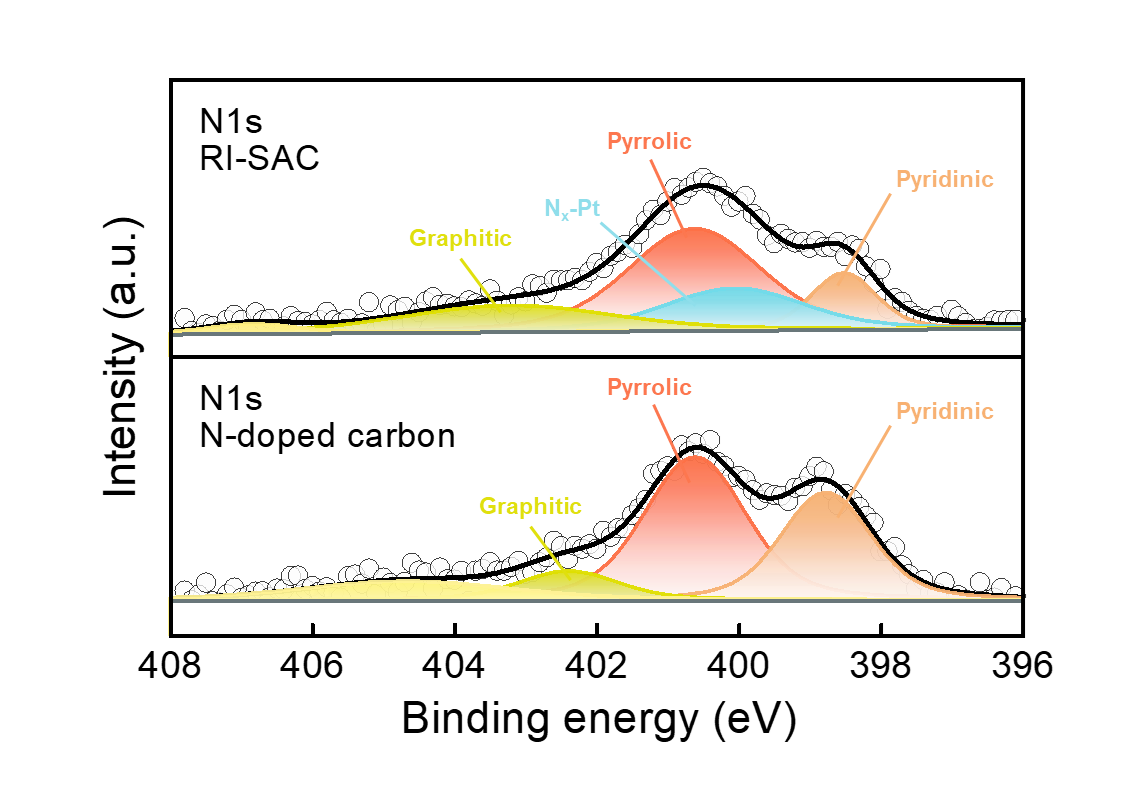


**Supplementary Figure 1. N 1s XPS spectra with peak fitting results for RI-SAC and N-doped carbon.**


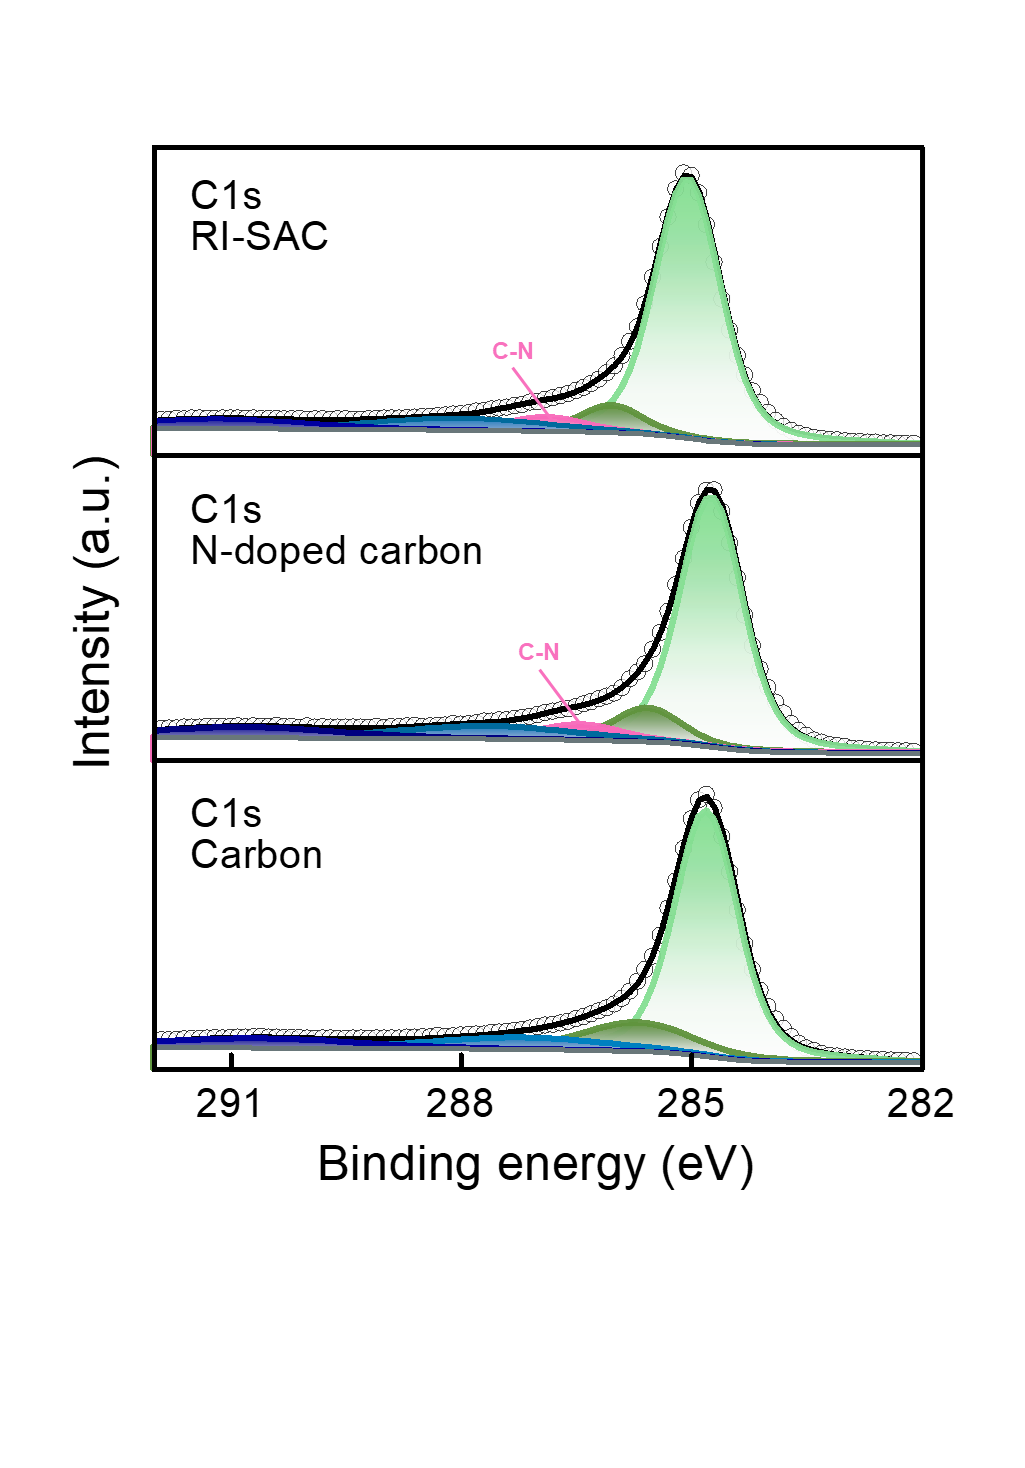


**Supplementary Figure 2. C 1s XPS spectra with peak fitting results for RI-SAC, N-doped carbon, and carbon.** The C–N peak, which was not observed in pristine carbon, appeared in both N-doped carbon and RI-SAC, indicating the successful incorporation of nitrogen into the carbon framework.

**Supplementary Figure 3. Pt loadings of RI-SAC and Pt/C.**


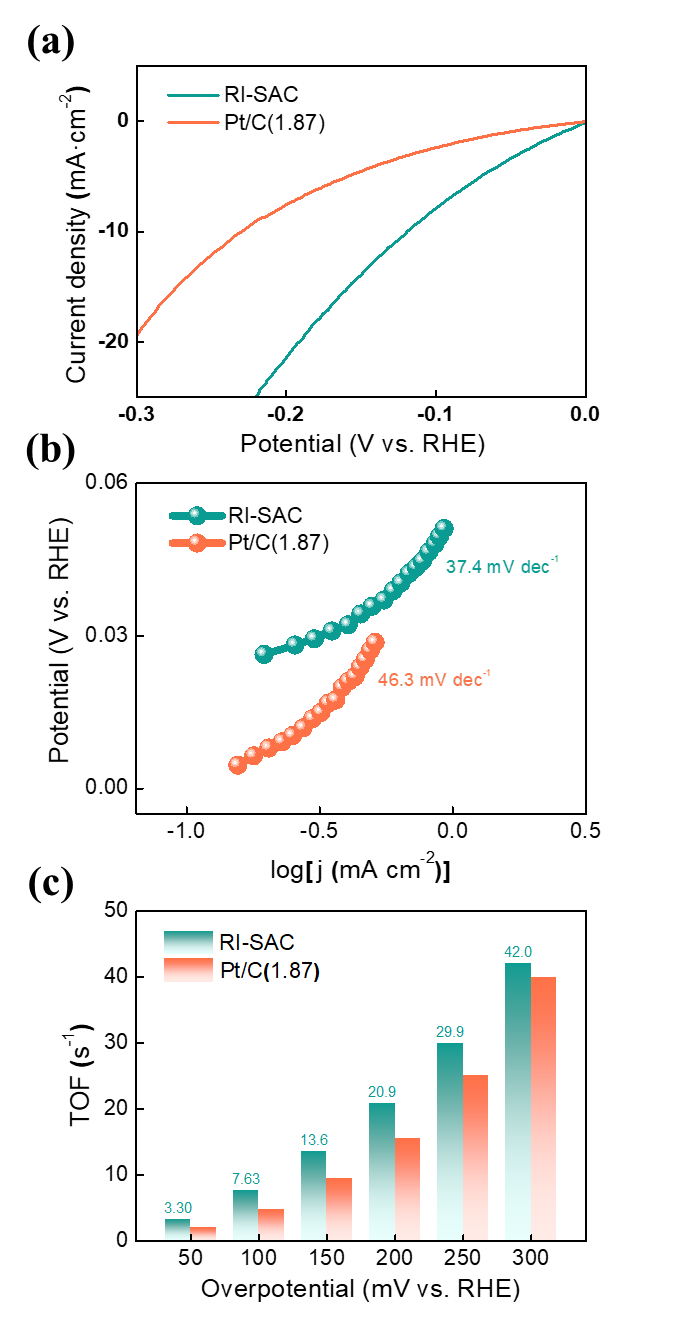


**Supplementary Figure 4. Comparison of (a) LSV curves, (b) Tafel plots, and (c) TOF values of RI-SAC and Pt/C catalysts with matched Pt loadings (Pt/C(1.87)).** Compared with Pt/C(1.87), RI-SAC exhibited superior performance in terms of the overpotential, Tafel slope, and TOF.

**Supplementary Figure 5. CP durability test of Pt/C(1.87) conducted for 10 h at 10 mA cm-2.** At an equivalent Pt loading, the Pt/C catalyst exhibited a relatively pronounced decline in performance during the CP test compared with RI-SAC.


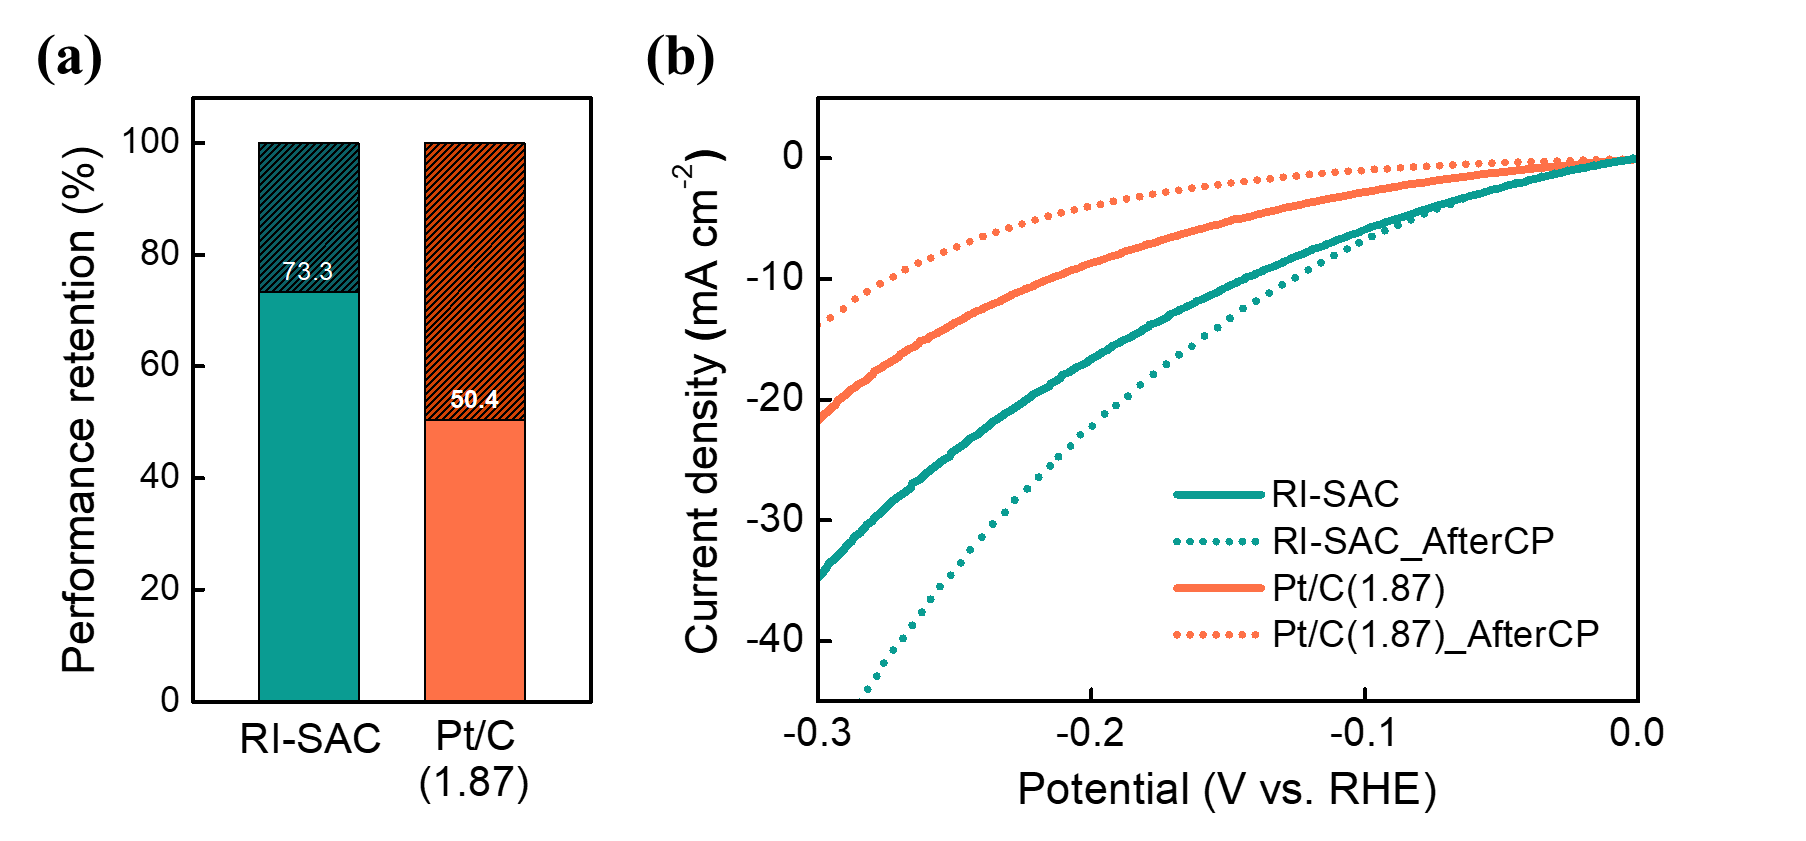


**Supplementary Figure 6. (a) Performance retention of Pt/C(1.87) after the CP durability test and (b) LSV curves recorded after CP.** After CP operation, Pt/C(1.87) exhibited a pronounced loss of activity, retaining only 50.4% of its initial performance, which was lower than that of RI-SAC (73.3%). This degradation was also evident in the LSV curve recorded after CP.

**Supplementary Figure 7. LSV curves of the RI-SAC measured at various rotational speeds from 400 to 2,000 rpm.**


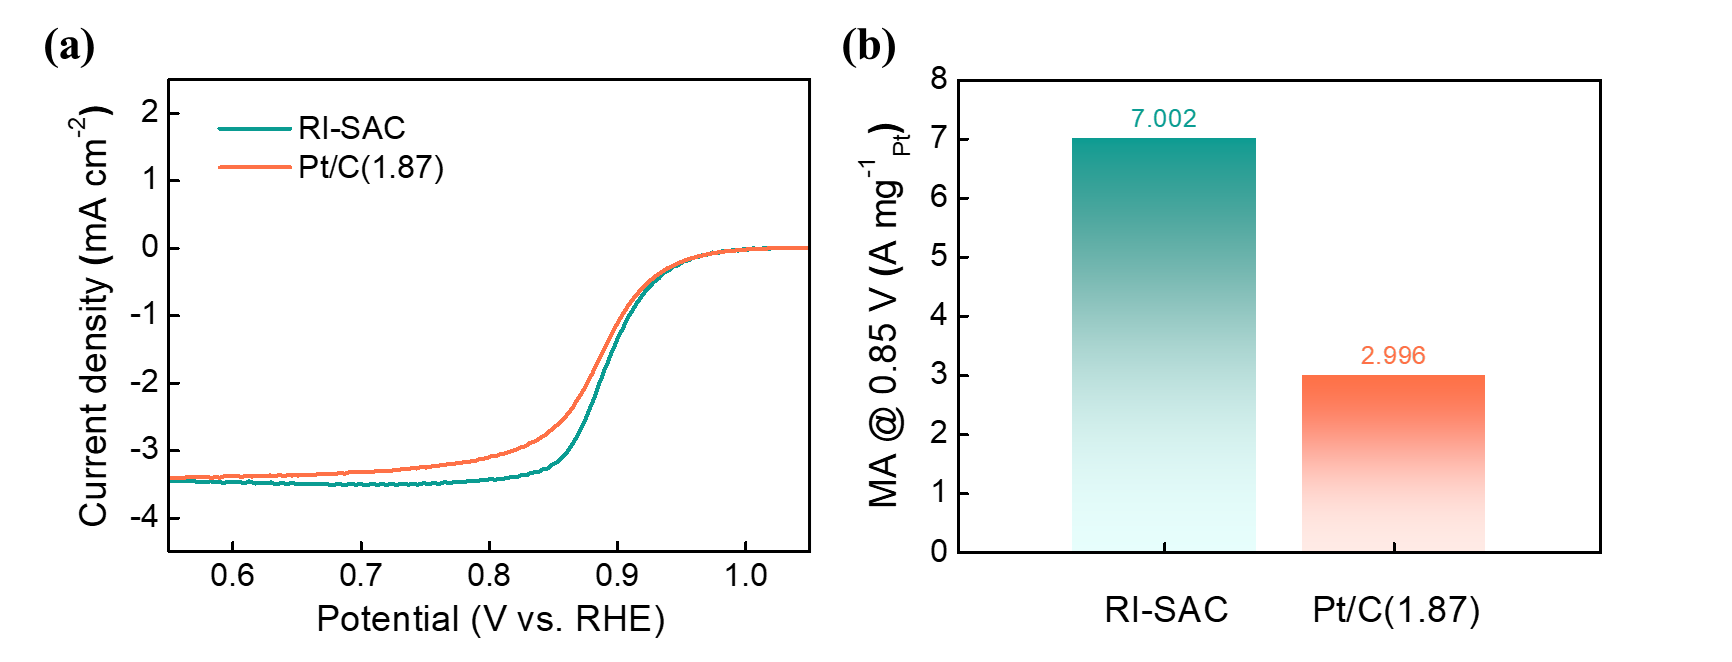


**Supplementary Figure 8. Comparison of (a) LSV curves and (b) mass activity of RI-SAC and Pt/C catalysts with matched Pt loadings.** RI-SAC, with the same Pt loading as Pt/C, shows a higher half-wave potential and about 2.3 times higher mass activity at 0.85 VRHE.


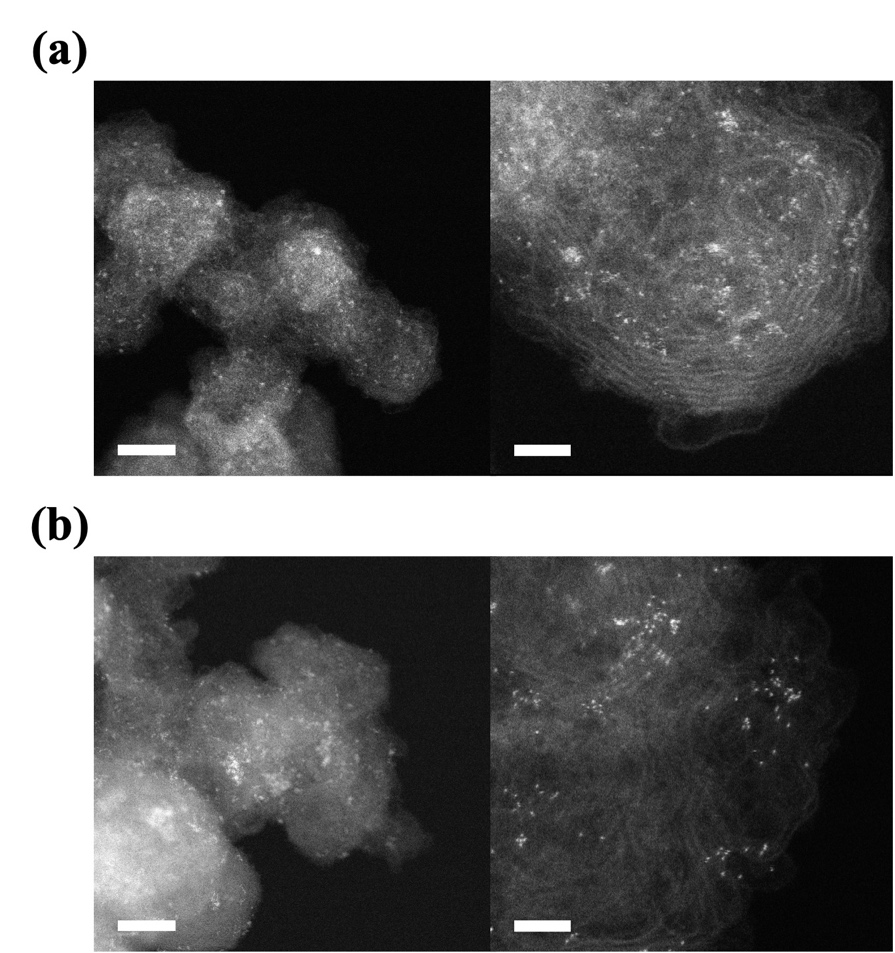


**Supplementary Figure 9. TEM images of atomic-level dispersed catalyst synthesis by the same method (left, scale bar = 10 nm, and right, scale bar = 2 nm): (a) Pd and (b) Ir.**

**
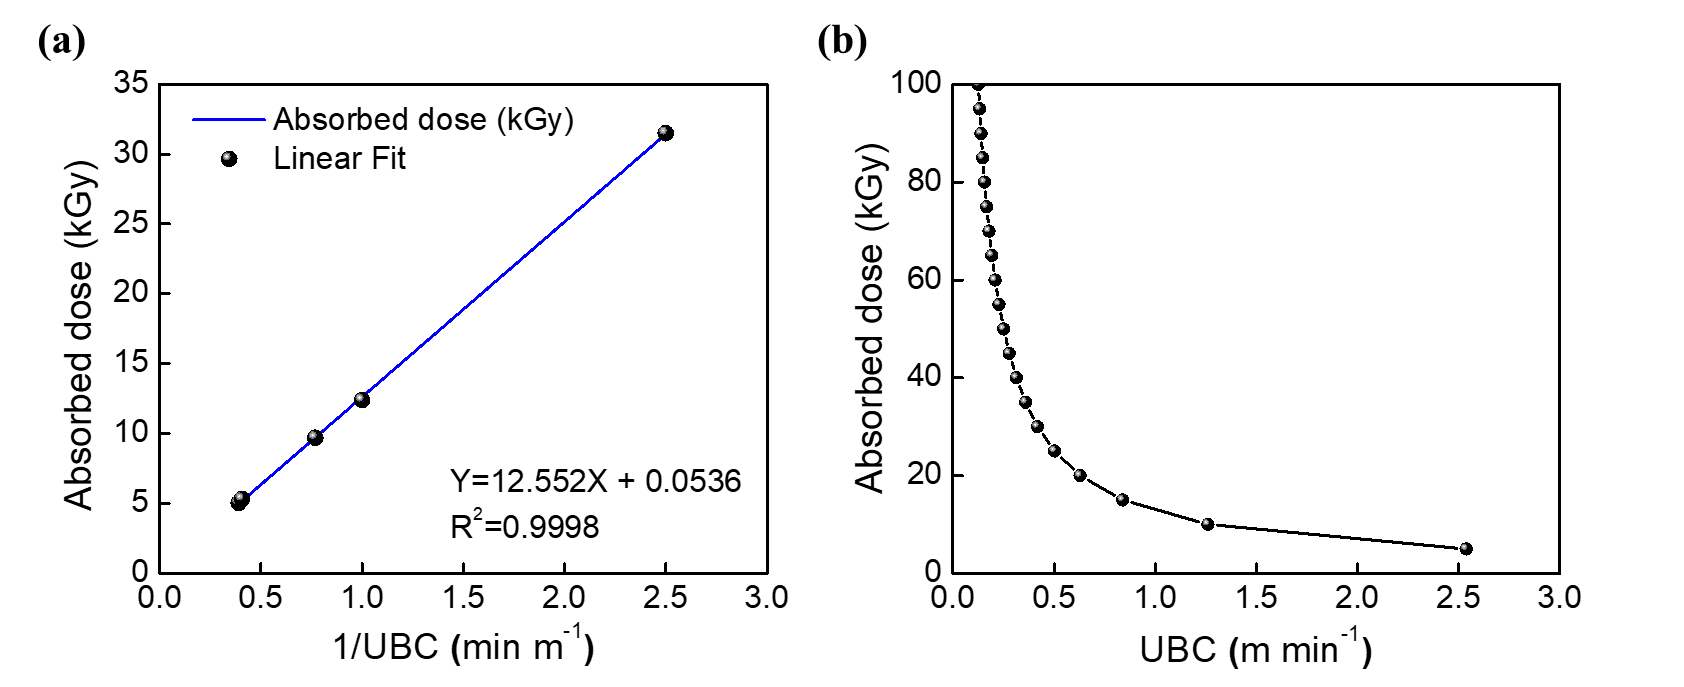
**

**Supplementary Figure 10. Absorbed dose as a function of the UBC: (a) linear plot as a function with  and (b) nonlinear decay with the UBC.**

**
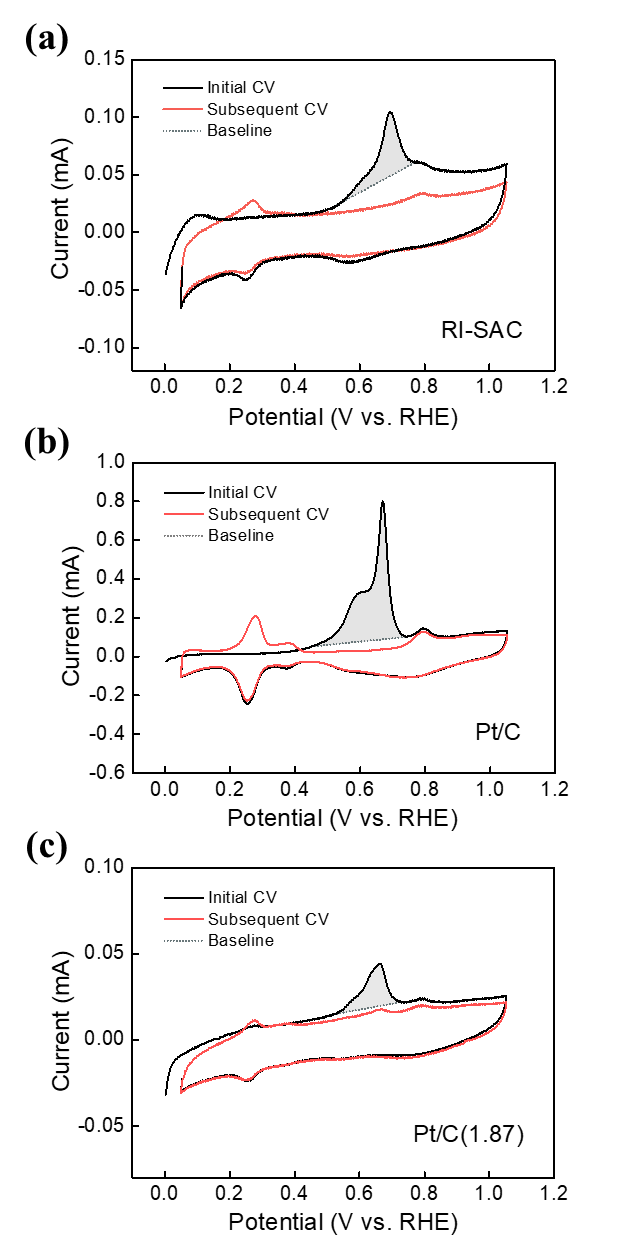
**

**Supplementary Figure 11. Integrated region of CO-stripping, corresponding to the CO oxidation and desorption area used for TOF calculation.**

**Supplementary references**

1. Mosallanezhad, A. *et al.* Interfacial synergies between single-atomic Pt and CoS for enhancing hydrogen evolution reaction catalysis. *Appl. Catal*. *B* **315**, 121534 (2022). https://doi.org/10.1016/j.apcatb.2022.121534.
2. Chen, Y. *et al.* Plasma-assisted highly dispersed Pt single atoms on Ru nanoclusters electrocatalyst for pH-universal hydrogen evolution. *Chem. Eng. J.* **448**, 137611 (2022). https://doi.org/10.1016/j.cej.2022.137611.
3. Pei, A. *et al.* Effective electronic tuning of Pt single atoms via heterogeneous atomic coordination of (Co,Ni)(OH)2 for efficient hydrogen evolution. *Energy Environ. Sci.* **16**, 1035–1048 (2023). https://doi.org/10.1039/D2EE02785B.
4. Zhang, R. *et al.* Single-atomic platinum on fullerene C60 surfaces for accelerated alkaline hydrogen evolution. *Nat. Commun.* **14**, 2460 (2023). https://doi.org/10.1038/s41467-023-38126-z.
5. Jiang, Y. *et al.* Ultrahigh Pt-mass-activity catalyst for alkaline hydrogen evolution synthesized by microwave method in air. *Ceram. Int.* **50**, 34789–34795 (2024). https://doi.org/10.1016/j.ceramint.2024.06.286.
6. Xu, H. *et al.* Ultralow Pt loading on CoFe layered double hydroxides achieves superior alkaline hydrogen evolution through interfacial synergistic catalysis. *Catal. Sci. Technol.* **15**, 6231–6239 (2025). https://doi.org/10.1039/D5CY00915D.
7. Li, Z. *et al.* In situ doping Pt single atoms into 3D flower-like 1T-MoS2 via Pt-S bond for efficient hydrogen evolution reaction. *J. Colloid Interface Sci.* **689**, 137282 (2025). https://doi.org/10.1016/j.jcis.2025.137282.
8. Wu, P. *et al.* Dynamic modulation of Pt 5*d* valence electrons by single-atom Cu for boosted alkaline hydrogen evolution catalysis. *J. Energy Chem.* **110**, 372–381 (2025). https://doi.org/10.1016/j.jechem.2025.06.066.
9. Zheng, X. *et al.* Ohmic contact heterostructures immobilized Pt single atoms for boosting alkaline hydrogen evolution reaction. *Small* **21**, 2411696 (2025). https://doi.org/10.1002/smll.202411696.
10. Pu, Z. *et al.* Anion-modulated platinum for high-performance multifunctional electrocatalysis toward HER, HOR, and ORR. *Iscience* **23**, 101793 (2020). https://doi.org/10.1016/j.isci.2020.101793.
11. Shi, G. *et al.* Temperature dependence of oxygen reduction activity at Pt/Nb-doped SnO2 catalysts with varied Pt loading. *ACS Catal.* **11**, 5222–5230 (2021). https://doi.org/10.1021/acscatal.0c05157.
12. Fracchia, M. *et al.* Molecular cluster route for the facile synthesis of a stable and active Pt nanoparticle catalyst. *New J. Chem.* **45**, 11292–11303 (2021). https://doi.org/10.1039/D1NJ00937K.
13. Xiao, Z., Wu, H., Zhong, H., Abdelhafiz, A. & Zeng, J. De-alloyed PtCu/C catalysts with enhanced electrocatalytic performance for the oxygen reduction reaction. *Nanoscale* **13**, 13896–13904 (2021). https://doi.org/10.1039/D1NR02820K.
14. Đukić, T. *et al.* Understanding the crucial significance of the temperature and potential window on the stability of carbon supported Pt-alloy nanoparticles as oxygen reduction reaction electrocatalysts. *ACS Catal.* **12**, 101–115 (2021). https://doi.org/10.1021/acscatal.1c04205.
15. Chen, Z., Liao, Y. & Chen, S. Facile synthesis of platinum-copper aerogels for the oxygen reduction reaction. *Energy Mater.* **2**, 200033 (2022). https://doi.org/10.20517/energymater.2022.36.
16. Zhong, H. *et al.* Tuning oxygen reduction reaction activity via structure orientation and surface arrangement: a study on ordered PtCo/C catalysts. *Int. J. Hydrog. Energy* **47**, 40952–40960 (2022). https://doi.org/10.1016/j.ijhydene.2022.09.177.
17. Gong, L. *et al.* Marriage of ultralow platinum and single-atom MnN4 moiety for augmented ORR and HER catalysis. *ACS Catal.* **13**, 4012–4020 (2023). https://doi.org/10.1021/acscatal.2c06340.
18. Wu, B. *et al.* Arranging electronic localization of PtCu nanoalloys to stimulate improved oxygen electroreduction for high-performance fuel cells. *CCS Chem.* **5**, 2545–2556 (2023). https://doi.org/10.31635/ccschem.022.202202552.
19. Bhalothia, D. *et al.* Pt-Mediated interface engineering boosts the oxygen reduction reaction performance of Ni Hydroxide-Supported Pd nanoparticles. *ACS Appl. Mater. Interfaces* **15**, 16177–16188 (2023). https://doi.org/10.1021/acsami.2c21814.
20. Cui, J. *et al.* Carbon-anchoring synthesis of Pt1Ni1@Pt/C core-shell catalysts for stable oxygen reduction reaction. *Nat. Commun.* **15**, 9458 (2024). https://doi.org/10.1038/s41467-024-53808-y.
21. Bhalothia, D. *et al.* Potential synergy between Pt2Ni4 Atomic-Clusters, oxygen vacancies and adjacent Pd nanoparticles outperforms commercial Pt nanocatalyst in alkaline fuel cells. *Chem. Eng. J.* **483**, 149421 (2024). https://doi.org/10.1016/j.cej.2024.149421.
22. Lu, S. *et al.* Simultaneously geometrical and electronic modulation of L10-PtZn by Trace Ge boosts high-performance oxygen reduction reaction. *Small* **20**, 2305296 (2024). https://doi.org/10.1002/smll.202305296.
23. Bhalothia, D., Bagaria, A., Beniwal, A. & Chen, T. Y. Strong electronic coupling between CoNi mixed oxide support and PdPt nanoalloys enables highly active and durable oxygen reduction reaction. *Sci. Rep.* **15**, 23403 (2025). https://doi.org/10.1038/s41598-025-07795-9.
24. Beniwal, A., Gurjar, H., Shekhawat, K., Bagaria, A. & Bhalothia, D. Screening the oxygen reduction reaction performance of carbon-supported Pt-M (M= Ni, Cu, Co) Binary Electrocatalysts via Tuning Metal–Support Interaction. *Oxygen* **5**, 10 (2025). https://doi.org/10.3390/oxygen5030010.
25. He, X. *et al.* Mechanochemical kilogram-scale synthesis of noble metal single-atom catalysts. *Cell Rep. Phys. Sci.* **1**, 100004 (2020). https://doi.org/10.1016/j.xcrp.2019.100004.
26. Zhang, H. *et al.* Highly efficient fabrication of kilogram-scale palladium single-atom catalysts for the Suzuki–Miyaura cross-coupling reaction. *ACS Appl. Mater. Interfaces* **14**, 53755–53760 (2022). https://doi.org/10.1021/acsami.2c14743.
27. He, X. *et al.* Building up libraries and production line for single atom catalysts with precursor-atomization strategy. *Nat. Commun.* **13**, 5721 (2022). https://doi.org/10.1038/s41467-022-33442-2.
28. Duan, Y. *et al.* Large-scale synthesis of high-loading single metallic atom catalysts by a metal coordination route. *Adv. Mater.* **36**, 2404900 (2024). https://doi.org/10.1002/adma.202404900.
29. Yang, H. *et al.* A universal ligand mediated method for large scale synthesis of transition metal single atom catalysts. *Nat. Commun.* **10**, 4585 (2019). https://doi.org/10.1038/s41467-019-12510-0.
30. Huo, J. *et al.* Solid-phase production of Co–N–C electrocatalysts at a kilogram scale via the Kirkendall effect for proton exchange membrane fuel cells. *EES Catal.* (2026). https://doi.org/10.1039/d5ey00264h.

1. † These authors contributed equally to this work. [↑](#footnote-ref-1)
